# Supplementary material for: Unknown mutations and genotype/phenotype correlations of autosomal recessive congenital ichthyosis in patients from Saudi Arabia and Pakistan
Source: PubMed Central journal article supplement (PMC6418373; doi:10.1002/mgg3.539), 2019-01-01
Supplement: MGG3-7-na-s001.pdf [file MGG3-7-na-s001.pdf]

**Unknown mutations and genotype/phenotype correlations of autosomal recessive congenital ichthyosis in patients from Saudi Arabia and Pakistan**

**Journal** Molecular Genetics & Genomic Medicine

**Authors** Dulce Lima Cunha<sup>1,2,3</sup> [ORCID 0000-0002-6814-8365], Omar Mohammed Alakloby<sup>4</sup>, Robert Gruber<sup>5</sup>, Naseebullah Kakar<sup>6,7</sup>, Jamil Ahmad<sup>7</sup>, Salem Alawbathani<sup>3</sup>, Roswitha Plank<sup>1,2</sup>, Katja Eckl<sup>1,2,8</sup>, Birgit Krabichler<sup>2</sup>, Janine Altmüller<sup>3</sup>, Peter Nürnberg<sup>3,9</sup>, Johannes Zschocke<sup>2</sup>, Guntram Borck<sup>6</sup>, Matthias Schmuth<sup>5</sup>, Adnan S. Alabdulkareem<sup>10</sup>, Kholood Abdulaziz Alnutaifi<sup>4</sup>, Hans Christian Hennies<sup>1,2,3,9</sup> [ORCID 0000-0001-7210-2389]

**Corresponding Author** Dr. Hans C. Hennies, Dept. of Biological and Geographical Sciences, University of Huddersfield, Huddersfield HD1 3DH, UK; phone +44-1484-473014; email [h.c.hennies@hud.ac.uk](mailto:h.c.hennies@hud.ac.uk)

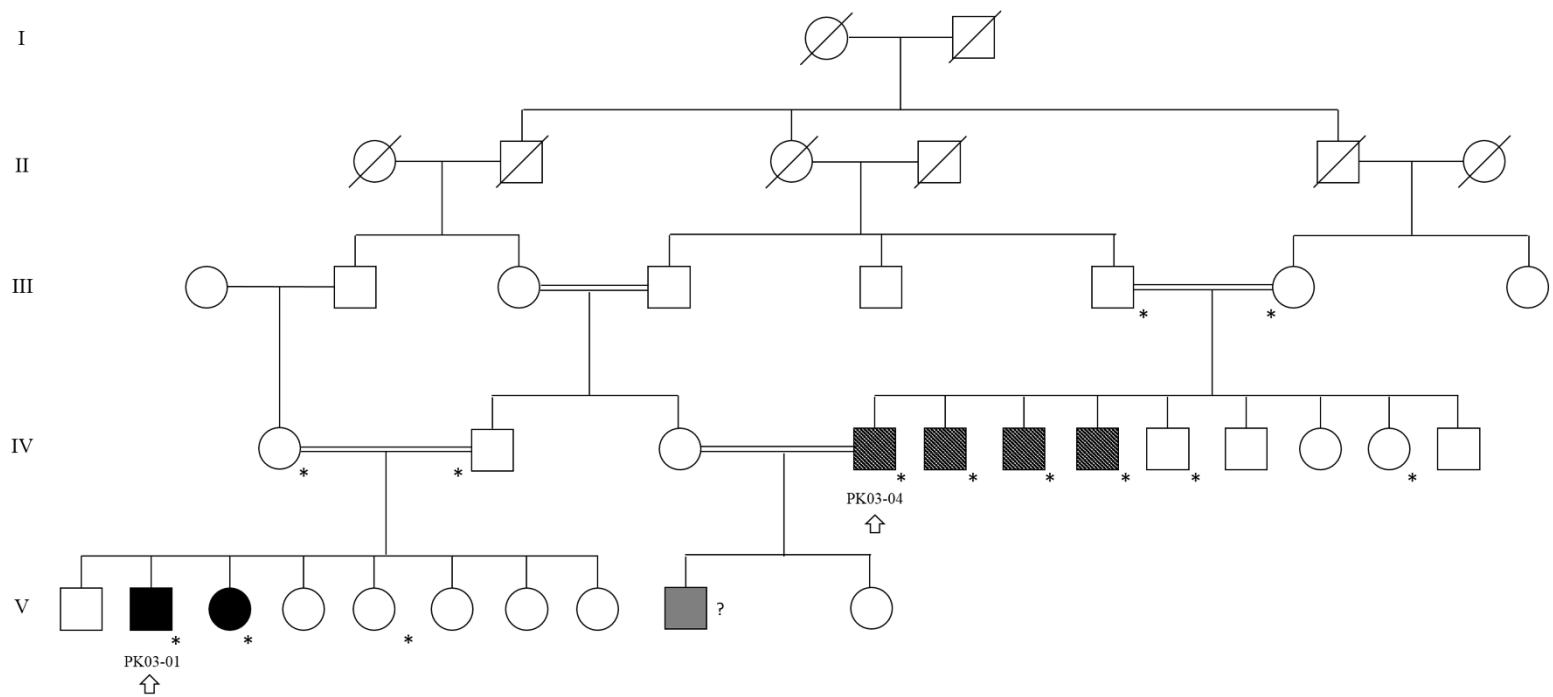

**Figure S1.** Pedigree of family PK03. Mutation analysis confirmed a diagnosis of ARCI caused by mutations in *ALOXE3* in the left branch (filled symbols) and revealed Papillon Lefèvre syndrome caused by mutations in *CTSC* in the right branch (hatched symbols) of the family. One reportedly affected person was not seen by any of the authors (grey symbol). Index cases marked by arrows ( $\hat{\uparrow}$ ) were analysed with homozygosity mapping, co-segregation was confirmed in individuals marked by asterisks (\*).
