# Supplementary material for: Unknown mutations and genotype/phenotype correlations of autosomal recessive congenital ichthyosis in patients from Saudi Arabia and Pakistan
Source: PubMed Central journal article supplement (PMC6418373; doi:10.1002/mgg3.539), 2019-01-01
Supplement: MGG3-7-na-s002.pdf [file MGG3-7-na-s002.pdf]

# Unknown mutations and genotype/phenotype correlations of autosomal recessive congenital ichthyosis in patients from Saudi Arabia and Pakistan

**Journal** Molecular Genetics & Genomic Medicine

**Authors** Dulce Lima Cunha<sup>1,2,3</sup> [ORCID 0000-0002-6814-8365], Omar Mohammed Alakloby<sup>4</sup>, Robert Gruber<sup>5</sup>, Naseebullah Kakar<sup>6,7</sup>, Jamil Ahmad<sup>7</sup>, Salem Alawbathani<sup>3</sup>, Roswitha Plank<sup>1,2</sup>, Katja Eckl<sup>1,2,8</sup>, Birgit Krabichler<sup>2</sup>, Janine Altmüller<sup>3</sup>, Peter Nürnberg<sup>3,9</sup>, Johannes Zschocke<sup>2</sup>, Guntram Borck<sup>6</sup>, Matthias Schmuth<sup>5</sup>, Adnan S. Alabdulkareem<sup>10</sup>, Kholood Abdulaziz Alnutaifi<sup>4</sup>, Hans Christian Hennies<sup>1,2,3,9</sup> [ORCID 0000-0001-7210-2389]

**Corresponding Author** Dr. Hans C. Hennies, Dept. of Biological and Geographical Sciences, University of Huddersfield, Huddersfield HD1 3DH, UK; phone +44-1484-473014; email [h.c.hennies@hud.ac.uk](mailto:h.c.hennies@hud.ac.uk)

**Table S1.** Homozygosity regions matching ARCI gene intervals identified after homozygosity mapping.

| Patient | Chromosome region            | % Heterozygosity              | Length     | Cytoband        | ARCI gene match       |
|---------|------------------------------|-------------------------------|------------|-----------------|-----------------------|
| SA-01   | chr14:23,172,456-25,025,737  | 0.0                           | 1,853,282  | 14q11.2 - q12   | <i>TGM1</i>           |
| SA-02   | chr2:202,252,090-215,853,470 | 0.304                         | 13,601,381 | 2q33.1 - q35    | <i>ABCA12</i>         |
| SA-04   | chr14:22,879,230-28,961,059  | 0.630                         | 6,081,830  | 14q11.2 - q12   | <i>TGM1</i>           |
| SA-05   | chr14:23,172,456-25,203,263  | 0.0                           | 2,030,808  | 14q11.2 - q12   | <i>TGM1</i>           |
| SA-06   | chr2:175,291,934-220,342,826 | 0.172                         | 45,050,893 | 2q31.1 - q35    | <i>ABCA12</i>         |
|         | chr14:19,283,777-29,454,152  | 0.283                         | 10,170,376 | 14q11.2 - q12   | <i>TGM1</i>           |
| SA-08   | chr5:148,741,029-168,469,088 | 0.0                           | 19,728,060 | 5q33.1 - q35.1  | <i>NIPAL4</i>         |
| SA-09   | chr5:140,154,033-161,846,378 | 0.118                         | 21,692,346 | 5q31.3 - q34    | <i>NIPAL4</i>         |
|         | chr15:91,645,431-100,338,915 | 0.0                           | 8,693,485  | 15q26.1 - q26.3 | <i>CERS3</i>          |
| SA-10   | chr5:141,611,117-169,435,977 | 0.0                           | 27,824,861 | 5q31.3 - q35.1  | <i>NIPAL4</i>         |
| SA-11   | chr5:123,557,892-159,370,345 | 0.072                         | 35,812,454 | 5q23.2 - q33.3  | <i>NIPAL4</i>         |
| SA-12   | chr14:21,340,759-32,111,277  | 0.105                         | 10,770,519 | 14q11.2 - q13.1 | <i>TGM1</i>           |
| SA-13   | chr14:19,283,777-32,590,349  | 0.226                         | 13,306,573 | 14q11.2 - q13.1 | <i>TGM1</i>           |
| SA-14   | chr6:25,601,239-50,108,951   | 0.037                         | 24,507,713 | 6p22.2 - p12.3  | <i>PNPLA1</i>         |
|         | chr17:6,908,440-14,157,308   | 0.089                         | 7,248,869  | 17p13.1 - p12   | <i>ALOXE3/ALOX12B</i> |
|         | chr14:20,866,317-25,502,331  | 0.0                           | 4,636,015  | 14q11.2 - q12   | <i>TGM1</i>           |
| SA-15   | chr19:15,434,569-22,399,457  | 0.206                         | 6,964,889  | 19p13.12 - p12  | <i>CYP4F22</i>        |
| YE-01   | chr14:24,679,877-32,924,012  | 0.77                          | 8,244,135  | 14q11.2 - q12   | <i>TGM1</i>           |
| PK01-01 | chr2:179,263,031-220,406,107 | aggregate of 3 patients<br>NA | 41,143,076 | 2q31.2 - q35    | <i>ABCA12</i>         |
| PK01-02 |                              |                               |            |                 |                       |
| PK01-04 |                              |                               |            |                 |                       |
| PK02-01 | chr2:186,002,691-223,060,424 | aggregate of 2 patients<br>NA | 37,057,733 | 2q32.1 - q36.1  | <i>ABCA12</i>         |
| PK02-02 | chr5:149,594,981-163,460,290 |                               |            |                 |                       |
| PK03-01 | chr17:770,461-13,845,956     | aggregate of 2 patients<br>NA | 13,075,495 | 17p13.3 - p12   | <i>ALOXE3/ALOX12B</i> |
| PK03-04 |                              |                               |            |                 |                       |
| PK04-01 | chr17:5,757,535-13,141,886   | 0.094                         | 7,384,352  | 17p13.2 - p12   | <i>ALOXE3/ALOX12B</i> |
| PK05-01 | chr5:149,650,749-166,821,863 | aggregate of 3 patients<br>NA | 17,171,114 | 5q33.1 - q34    | <i>NIPAL4</i>         |
| PK05-03 |                              |                               |            |                 |                       |
| PK05-04 |                              |                               |            |                 |                       |
|         |                              |                               |            |                 |                       |
